# Supplementary material for: Magnetic Fe3O4@CoFe-LDH nanocomposite heterogeneously activated peroxymonosulfate for degradation of azo-dye AO7
Source: Royal Society of Chemistry journal article supplement (doi:10.1039/d1ra02973h), 2021-01-01
Supplement: d1ra02973h1.pdf [file d1ra02973h1.pdf]

Supporting information

**Magnetic  $\text{Fe}_3\text{O}_4@\text{CoFe-LDH}$  nanocomposite heterogeneously  
activated peroxymonosulfate for degradation of azo-dye AO7**

*Dapeng Sun<sup>1,2</sup>, Chuang Li<sup>2,3</sup>, Shengsen Lu<sup>1</sup>, Qingfeng Yang<sup>2\*</sup>, Chiquan He<sup>1\*</sup>*

<sup>1</sup>School of Environmental and Chemical Engineering, Shanghai University, Shanghai,  
200444, PR China

<sup>2</sup>Green Chemical Engineering Technology Research Center, Shanghai Advanced  
Research Institute, Chinese Academy of Sciences, Shanghai, 201210, PR China

<sup>3</sup>School of Chemistry and Chemical Engineering, University of Chinese Academy of  
Sciences, Beijing 100043, PR China

**Corresponding authors: Qingfeng Yang, Chiquan He.**

**Email address: [QFyang2021@163.com](mailto:QFyang2021@163.com), [cqhe@shu.edu.cn](mailto:cqhe@shu.edu.cn).**

### **Text S1 Synthesis of CoFe<sub>2</sub>O<sub>4</sub>**

Firstly, 0.1 mol CoCl<sub>2</sub>·6H<sub>2</sub>O and 0.2 mol FeCl<sub>3</sub>·6H<sub>2</sub>O were dissolved in 100 mL DI water and stirred for 30 min to obtain the homogeneous solution. Then, adding the 5M NaOH solution into the above solution until the pH reached 12. The mixed solution was heated at 363 K for 1h. In the end, the concentrated solution was added to the Teflon-lined stainless-steel autoclave and heated at 473 K for 20 h. The obtained black magnetic CoFe<sub>2</sub>O<sub>4</sub> particles were collected by external magnetic field, washed with deionized water and ethanol and dried overnight in oven at 333 K.

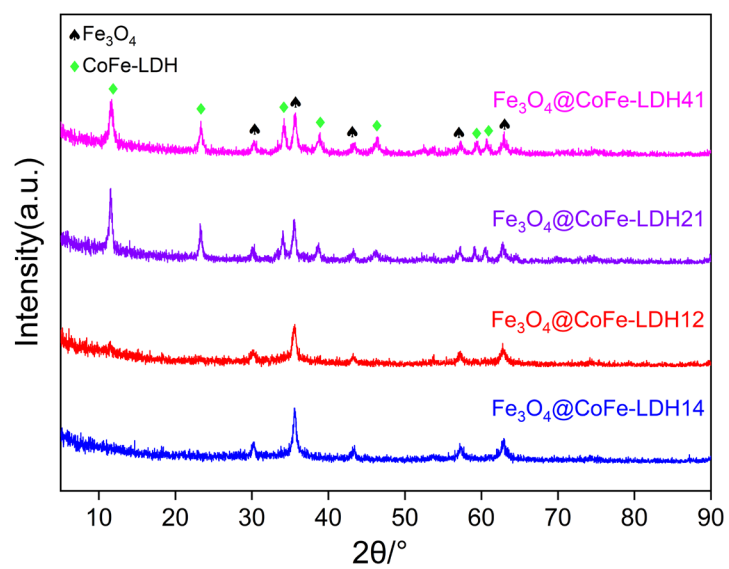

**Figure S1** XRD patterns of **Fe<sub>3</sub>O<sub>4</sub>@CoFe-LDH** with different Co to Fe ratio

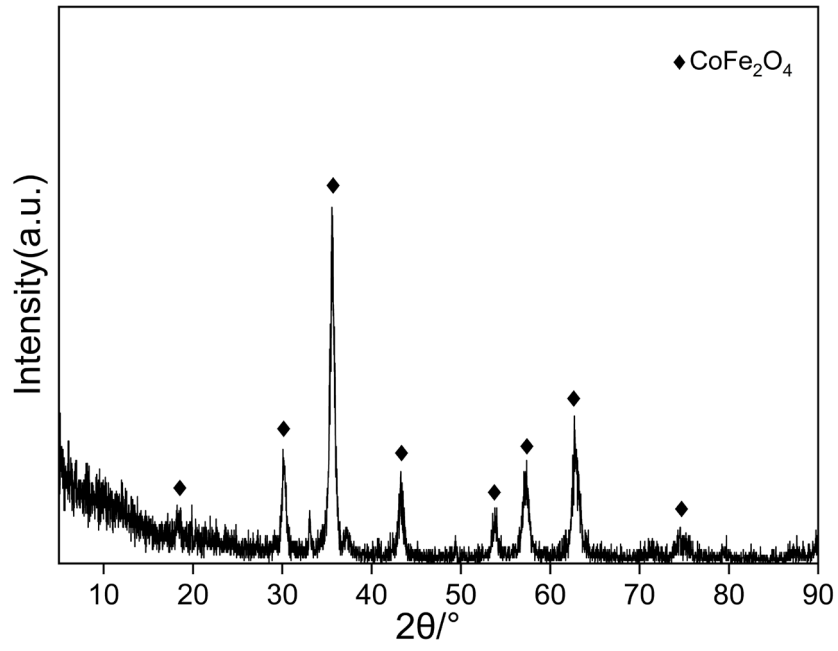

**Figure S2** XRD pattern of  $\text{CoFe}_2\text{O}_4$

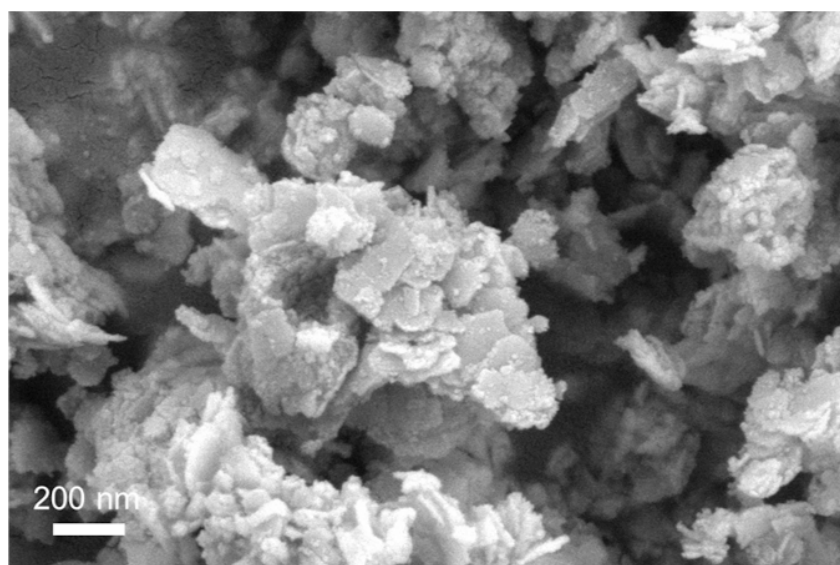

**Figure S3** SEM image of bare CoFe-LDH11

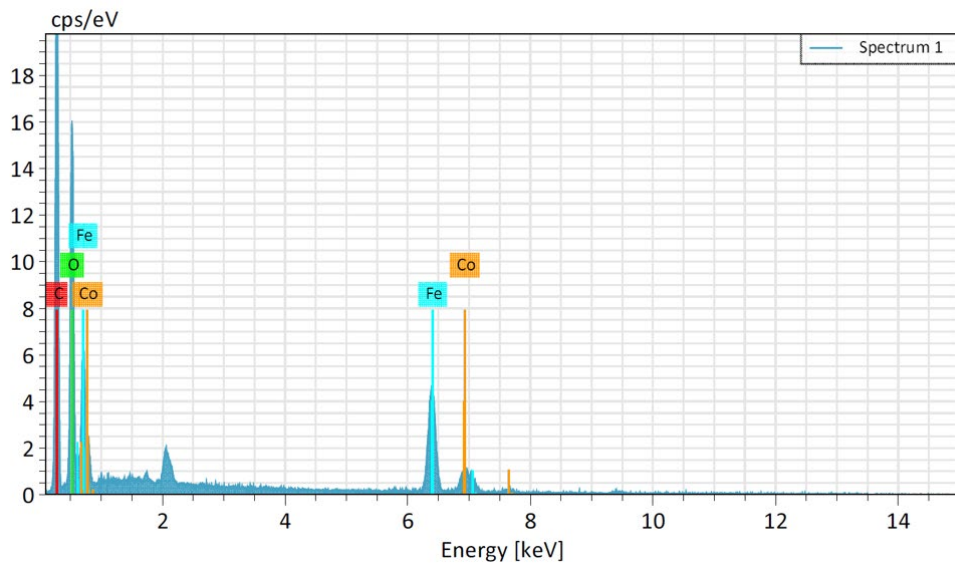

**Figure S4** EDS of **Fe<sub>3</sub>O<sub>4</sub>@CoFe-LDH**

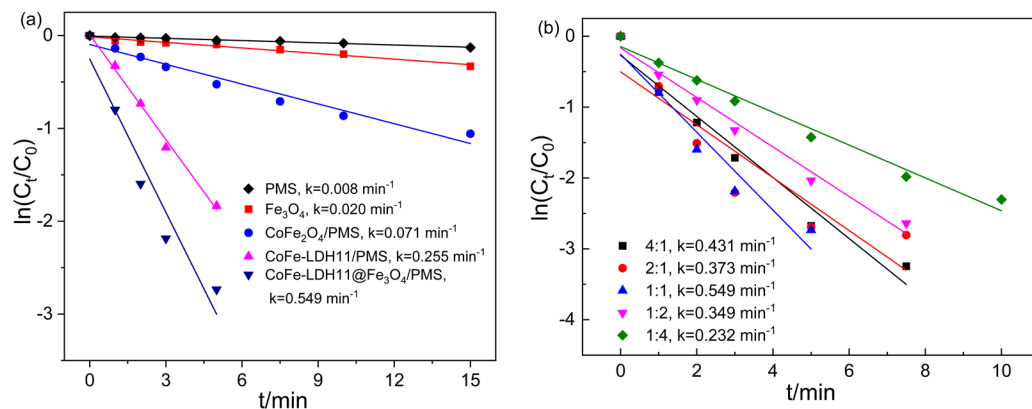

**Figure S5** Degradation kinetics of AO7 in different systems (a) and different Co to Fe molar ratio (b)

Experiment conditions: pH=6, T=298 K, V=0.1 L, [AO7] =40 mg/L, [catalyst] =50 mg/L, [PMS] =0.12 mM

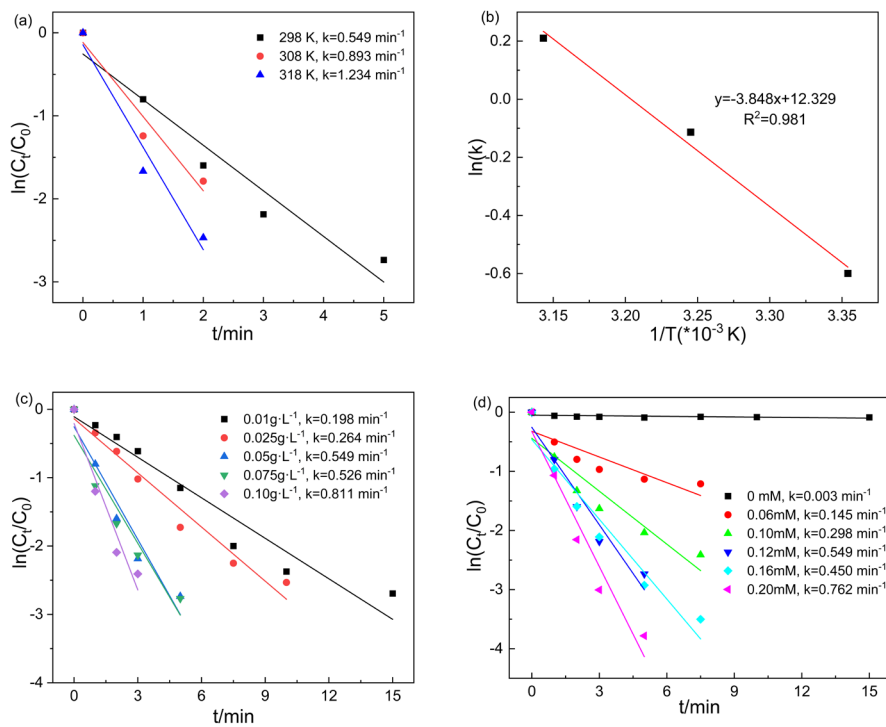

**Figure S6** Degradation kinetics of different temperature (a), different catalyst concentration (c) and different PMS dosage (d). The Arrhenius plot for AO7 decolorization (b)

Experiment conditions: pH=6 T=298 K (except a), V=0.1 L, [AO7]=40 mg/L, [catalyst]=50 mg/L (except c), [PMS]=0.12 mM (except d)



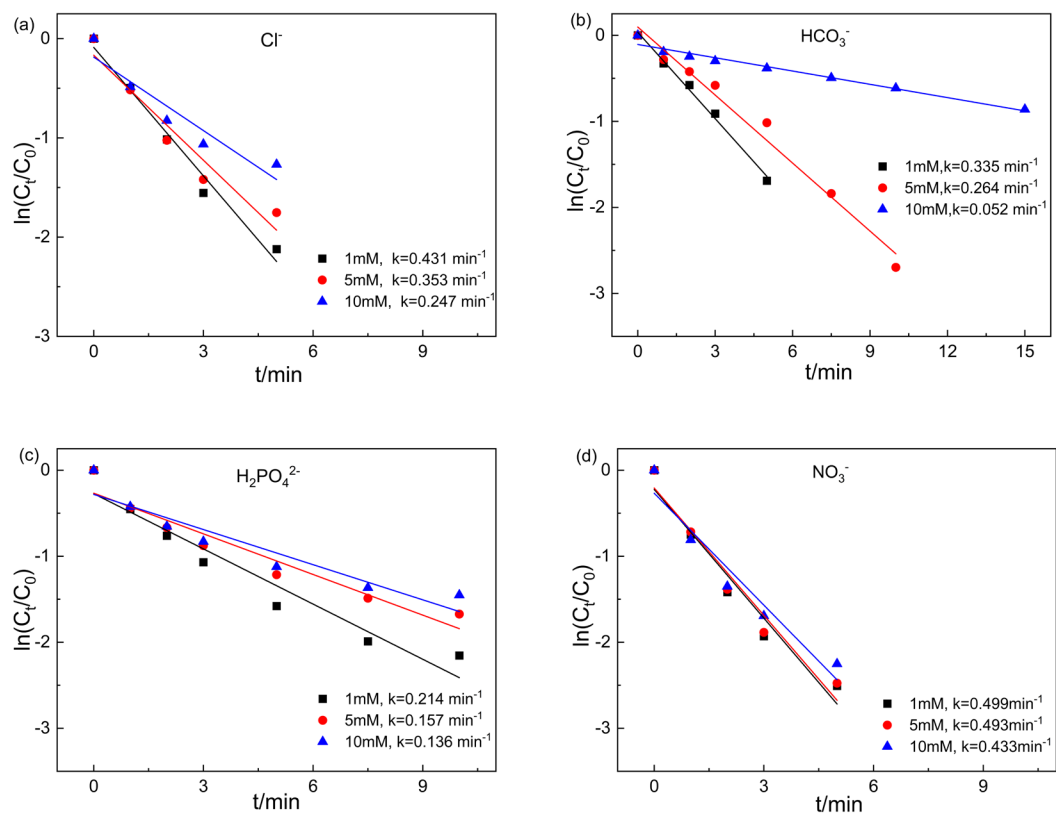

**Figure S7** Degradation kinetics of inorganic anions on AO7 removal. (a)  $\text{Cl}^-$ , (b)  $\text{HCO}_3^-$ , (c)  $\text{H}_2\text{PO}_4^{2-}$ , (d)  $\text{NO}_3^-$

Experiment conditions: pH=6, T=298 K, V=0.1 L, [AO7] =40 mg/L, [catalyst] =50 mg/L, [PMS]=0.12 mM

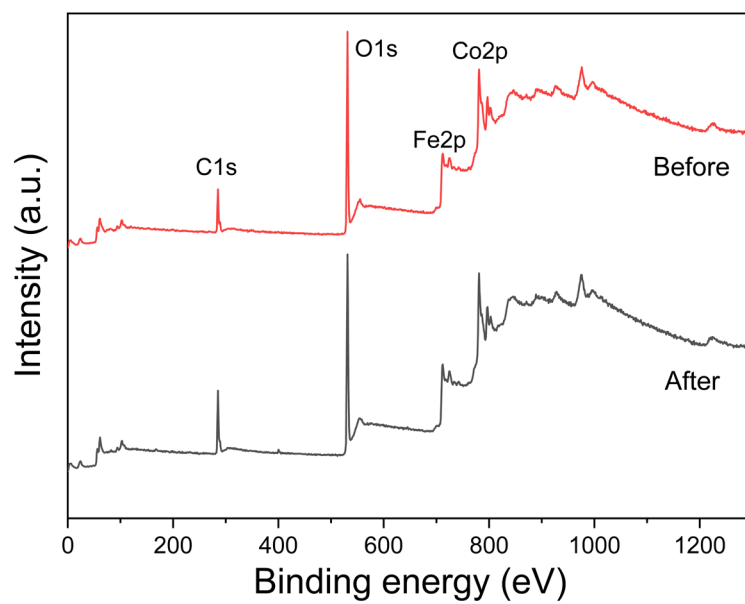

**Figure S8** XPS spectra of fresh and used  $\text{Fe}_3\text{O}_4@\text{CoFe-LDH}$
